# Supplementary material
Source: publisher site journal article supplement (https://static.cambridge.org/content/id/urn:cambridge.org:id:article:S0954422421000123/resource/name/S0954422421000123supp001.pdf)
Supplement: Supplementary file 1 [file S0954422421000123supp001.pdf]

Supplementary material: Search terms

|                |                                                                                                                                                                                                                                                                                                                                                                                                                                                                                                                                                                                                                                                                                                                                                               |
|----------------|---------------------------------------------------------------------------------------------------------------------------------------------------------------------------------------------------------------------------------------------------------------------------------------------------------------------------------------------------------------------------------------------------------------------------------------------------------------------------------------------------------------------------------------------------------------------------------------------------------------------------------------------------------------------------------------------------------------------------------------------------------------|
| <p>Medline</p> | <p>1 AND (2 OR 3)</p> <ol style="list-style-type: none"> <li>1. (chronotype OR diurnal preference OR circadian time OR circadian timing OR circadian preference OR circadian type OR "midpoint of sleep" OR morningness OR eveningness OR morning type OR evening type).mp</li> <li>2. feeding behavior/ OR eating/ OR energy intake/ OR night eating syndrome/ OR diet/ OR meals/ OR snacks/ OR breakfast/ OR lunch/</li> <li>3. (((meal* or eat* OR diet* or calori* or feed* or food* or nutrition*) adj5 (pattern* or habit* or time or timing or temporal or behav* or occasion* or episod* or intake or routine or frequency or skip or regular*)) or snack* or breakfast or lunch or dinner or night eating).mp</li> </ol>                             |
| <p>Embase</p>  | <p>1 AND (2 OR 3)</p> <ol style="list-style-type: none"> <li>1. (chronotype OR diurnal preference OR circadian time OR circadian timing OR circadian preference OR circadian type OR "midpoint of sleep" OR morningness OR eveningness OR morning type OR evening type).mp</li> <li>2. feeding behavior/ OR eating/ OR eating habit/ OR caloric intake/ OR dietary intake/ OR food intake/ OR diet/ OR meal/ OR meal frequency/ OR meal skipping/</li> <li>3. (((meal* or eat* OR diet* or calori* or feed* or food* or nutrition*) adj5 (pattern* or habit* or time or timing or temporal or behav* or occasion* or episod* or intake or routine or frequency or skip or regular*)) or snack* or breakfast or lunch or dinner or night eating).mp</li> </ol> |
| <p>Emcare</p>  | <p>1 AND (2 OR 3)</p> <ol style="list-style-type: none"> <li>1. (chronotype OR diurnal preference OR circadian time OR circadian timing OR circadian preference OR circadian type OR "midpoint of sleep" OR morningness OR eveningness OR morning type OR evening type).mp</li> <li>2. feeding behavior/ OR eating/ OR eating habit/ OR caloric intake/ OR dietary intake/ OR food intake/ OR diet/ OR meal/ OR meal frequency/ OR meal skipping/</li> <li>3. (((meal* or eat* OR diet* or calori* or feed* or food* or nutrition*) adj5 (pattern* or habit* or time or timing or temporal or behav* or occasion* or episod* or intake or routine or frequency or skip or regular*)) or snack* or breakfast or lunch or dinner or night eating).mp</li> </ol> |

|                  |                                                                                                                                                                                                                                                                                                                                                                                                                                                                                                                                                                                                                                                                                                                                                                                                                     |
|------------------|---------------------------------------------------------------------------------------------------------------------------------------------------------------------------------------------------------------------------------------------------------------------------------------------------------------------------------------------------------------------------------------------------------------------------------------------------------------------------------------------------------------------------------------------------------------------------------------------------------------------------------------------------------------------------------------------------------------------------------------------------------------------------------------------------------------------|
| PsycInfo         | <p>1 AND (2 OR 3)</p> <ol style="list-style-type: none"> <li>1. (chronotype OR diurnal preference OR circadian time OR circadian timing OR circadian preference OR circadian type OR "midpoint of sleep" OR morningness OR eveningness OR morning type OR evening type).mp</li> <li>2. eating behavior/ OR food intake/ OR diets/ OR mealtimes/ OR food/ OR nutrition OR calories/</li> <li>3. (((meal* or eat* OR diet* or calori* or feed* or food* or nutrition*) adj5 (pattern* or habit* or time or timing or temporal or behav* or occasion* or episod* or intake or routine or frequency or skip or regular*)) or snack* or breakfast or lunch or dinner or night eating).mp</li> </ol>                                                                                                                      |
| Cochrane Library | <p>1 AND (2 OR 3)</p> <ol style="list-style-type: none"> <li>1. Title Abstract Keyword: chronotype OR "diurnal preference" OR "circadian time" OR "circadian timing" OR "circadian preference" OR "circadian type" OR "midpoint of sleep" OR morningness OR eveningness OR "morning type" OR "evening type"</li> <li>2. Title Abstract Keyword: feeding behavior/ OR eating/ OR energy intake/ OR night eating syndrome/ OR diet/ OR meals/ OR snacks/ OR breakfast/ OR lunch/</li> <li>3. Title Abstract Keyword: (((meal* or eat* OR diet* or calori* or feed* or food* or nutrition*) near/4 (pattern* or habit* or time or timing or temporal or behav* or occasion* or episod* or intake or routine or frequency or skip or regular*)) or snack* or breakfast or lunch or dinner or "night eating")</li> </ol> |
| Web of Science   | <p>1 AND 2</p> <ol style="list-style-type: none"> <li>1. TS=(chronotype OR "diurnal preference" OR "circadian time" OR "circadian timing" OR "circadian preference" OR "circadian type" OR "midpoint of sleep" OR morningness OR eveningness OR "morning type" OR "evening type")</li> <li>2. TS=(((meal* or eat* OR diet* or calori* or feed* or food* or nutrition*) near/4 (pattern* or habit* or time or timing or temporal or behav* or occasion* or episod* or intake or routine or frequency or skip or regular*)) or snack* or breakfast or lunch or dinner or "night eating")</li> </ol>                                                                                                                                                                                                                   |
| Scopus           | <p>1 AND 2</p> <ol style="list-style-type: none"> <li>1. TITLE-ABS-KEY(chronotype OR "diurnal preference" OR "circadian time" OR "circadian timing" OR "circadian preference" OR "circadian type" OR "midpoint of sleep" OR morningness OR eveningness OR "morning type" OR "evening type")</li> </ol>                                                                                                                                                                                                                                                                                                                                                                                                                                                                                                              |

|  |                                                                                                                                                                                                                                                                                                           |
|--|-----------------------------------------------------------------------------------------------------------------------------------------------------------------------------------------------------------------------------------------------------------------------------------------------------------|
|  | <p>2. TITLE-ABS-KEY(((meal* or eat* OR diet* or calori* or feed* or food* or nutrition*) w/4 (pattern* or habit* or time or timing or temporal or behav* or occasion* or episod* or intake or routine or frequency or skip or regular*)) or snack* or breakfast or lunch or dinner or “night eating”)</p> |
|--|-----------------------------------------------------------------------------------------------------------------------------------------------------------------------------------------------------------------------------------------------------------------------------------------------------------|

Supplementary material: Eight categories of temporal patterns of eating

| Studies                      | Meal timings | Meal skipping | Energy distribution across the day | Meal frequency | Time interval between meals, or meals and wake/sleep times | Midpoint of food/energy intake | Meal regularity | Duration of eating window |
|------------------------------|--------------|---------------|------------------------------------|----------------|------------------------------------------------------------|--------------------------------|-----------------|---------------------------|
| (27; 37)                     | X            |               |                                    |                |                                                            | X                              |                 |                           |
| (28)                         |              | X             |                                    |                | X                                                          |                                |                 |                           |
| (29; 30; 32; 33)             |              |               | X                                  |                |                                                            |                                |                 |                           |
| (31; 34; 36; 38; 49; 50; 56) | X            |               |                                    |                |                                                            |                                |                 |                           |
| (35; 46; 47; 51; 54)         |              | X             |                                    |                |                                                            |                                |                 |                           |
| (39)                         |              | X             |                                    | X              |                                                            |                                |                 |                           |
| (40; 43; 57; 58)             | X            | X             |                                    |                |                                                            |                                |                 |                           |
| (41)                         |              | X             |                                    |                | X                                                          |                                | X               |                           |
| (42)                         |              |               |                                    |                |                                                            |                                | X               |                           |
| (44)                         | X            | X             |                                    | X              |                                                            |                                |                 |                           |
| (22; 45)                     | X            |               | X                                  |                |                                                            |                                |                 |                           |
| (48; 55)                     | X            |               | X                                  | X              |                                                            |                                |                 |                           |
| (52)                         | X            | X             | X                                  | X              | X                                                          |                                |                 |                           |
| (53)                         | X            |               |                                    |                | X                                                          |                                |                 |                           |
| (59)                         |              |               |                                    |                |                                                            | X                              |                 |                           |
| (60)                         | X            |               |                                    | X              |                                                            |                                |                 | X                         |
| (61)                         | X            |               |                                    |                | X                                                          |                                |                 |                           |
